# Supplementary material
Source: HighWire-hosted journal article supplement (https://jitc.bmj.com/content/9/8/e002554)
Supplement: inline-supplementary-material-5 [file inline-supplementary-material-5.pdf]

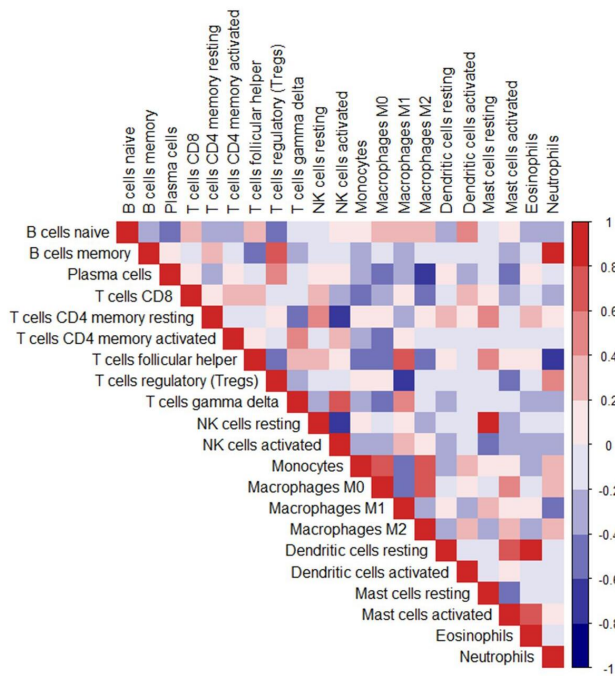

A) Correlation analysis of immune cells in high-risk group

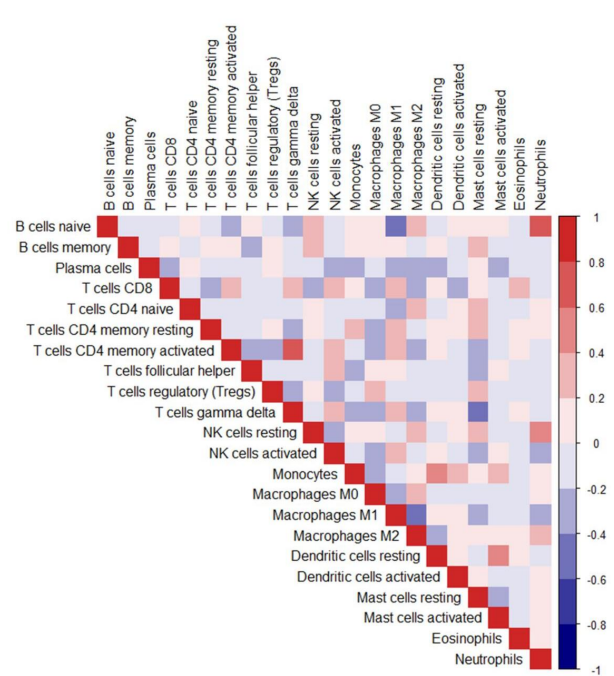

B) Correlation analysis of immune cells in low-risk group
